# Supplementary material
Source: HighWire-hosted journal article supplement (http://www.ajnr.org/highwire/filestream/96707/field_highwire_adjunct_files/0/0937.pdf)
Supplement: 0937.pdf [file 0937.pdf]

Online Supplemental Data

|                | <u>Risk of Bias</u> |            |                    |                 | <u>Applicability Concerns</u> |            |                    |
|----------------|---------------------|------------|--------------------|-----------------|-------------------------------|------------|--------------------|
|                | Patient Selection   | Index Test | Reference Standard | Flow and Timing | Patient Selection             | Index Test | Reference Standard |
| Buemi 2019     | +                   | +          | +                  | +               | +                             | +          | +                  |
| Ellingson 2014 | ?                   | +          | +                  | +               | +                             | +          | +                  |
| Ellingson 2017 | +                   | +          | +                  | +               | +                             | +          | +                  |
| Pope 2012      | +                   | +          | +                  | +               | +                             | +          | +                  |
| Rahman 2014    | ?                   | ?          | ?                  | +               | +                             | +          | +                  |
| Schell 2020    | +                   | +          | +                  | +               | +                             | +          | +                  |

  

|               |                  |              |
|---------------|------------------|--------------|
| <b>- High</b> | <b>? Unclear</b> | <b>+ Low</b> |
|---------------|------------------|--------------|

Online Fig 1. The results of Quality Assessment of Diagnostic Accuracy Studies 2 (QUADAS-2)

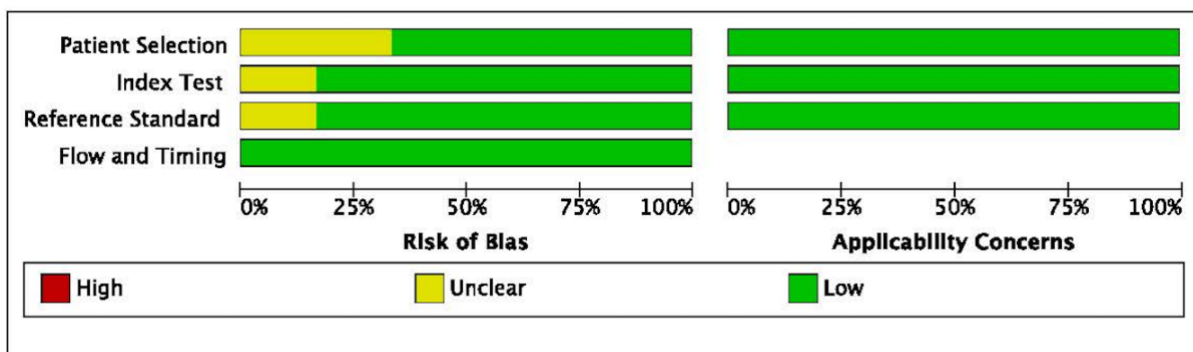

Online Fig 2. Bar graph of QUADAS-2 results of bias and applicability

**Online Table. Study characteristics**

| Study                       | Year | Region* | Period                       | Total N (BEV/Non-BEV) | Methods       | Trial | Definition of recurrence of glioblastoma                                                                             | Patients' age (year)        | Medications                                                     | ROI type            | ADC type                                                                       | Outcomes                 |
|-----------------------------|------|---------|------------------------------|-----------------------|---------------|-------|----------------------------------------------------------------------------------------------------------------------|-----------------------------|-----------------------------------------------------------------|---------------------|--------------------------------------------------------------------------------|--------------------------|
| Pope et al. <sup>9</sup>    | 2012 | US      | June, 2006 to February, 2007 | 97/NA                 | Retrospective | BRAIN | Histologically confirmed first or second relapse                                                                     | Mean 54 ± 12 (range, 23–79) | BEV alone or in combination with irinotecan                     | Volume; CEL         | The mean of the lower Gaussian curve (ADC <sub>L</sub> )                       | 6-month PFS<br>PFS<br>OS |
| Rahman et al. <sup>10</sup> | 2014 | US      | December, 2005 to July, 2012 | 91/NA                 | Retrospective | NA    | New or increased size of enhancing tumor ([25 % bidimensional products) based on MRI prior to bevacizumab initiation | Mean 56.3 (range, 23–83)    | BEV alone (n = 47)<br>BEV plus concurrent chemotherapy (n = 44) | Volume; T2L<br>CEL, | intermediate, and highest peak of the Gaussian curve (ADC-L, ADC-M, and ADC-H) | PFS<br>OS                |

|                                |      |             |                                        |       |               |         |                                                                                                                                                                                                                                         |                                                 |                                                                                               |             |                                                                                         |           |
|--------------------------------|------|-------------|----------------------------------------|-------|---------------|---------|-----------------------------------------------------------------------------------------------------------------------------------------------------------------------------------------------------------------------------------------|-------------------------------------------------|-----------------------------------------------------------------------------------------------|-------------|-----------------------------------------------------------------------------------------|-----------|
| Ellingson et al. <sup>11</sup> | 2014 | US          | November 15, 2005 to August 31, 2010   | 89/43 | Retrospective | NA      | Diagnosed on the basis of clinical data, MRI, and/or histology                                                                                                                                                                          | BEV: mean 58.0 ± 12<br>Non-BEV: mean 55.3 ± 9.9 | BEV alone or in combination with chemotherapy (carboplatin, irinotecan, etoposide, lomustine) | Volume; CEL | The mean of the upper and lower Gaussian curve (ADC <sub>H</sub> and ADC <sub>L</sub> ) | PFS<br>OS |
| Ellingson et al. <sup>12</sup> | 2017 | Netherlands | December 11, 2009 to November 10, 2011 | 42/39 | Retrospective | NTR1929 | First progression after previous chemoradiotherapy with temozolomide, documented by MRI with at least one bi-dimensionally measurable target lesion with one diameter of at least 10 mm, visible on two or more axial slices 5 mm apart | BEV: 56.3 ± 1.5<br>Non-BEV: 56.0 ± 1.4          | BEV alone (n = 42)                                                                            | Volume; CEL | The mean of the upper and lower Gaussian curve (ADC <sub>H</sub> and ADC <sub>L</sub> ) | OS        |

|                             |      |             |                              |         |               |             |                                                                                                                                                                                                                                                          |                                                                                                |                                                                                                                                          |                  |                                                                                         |        |
|-----------------------------|------|-------------|------------------------------|---------|---------------|-------------|----------------------------------------------------------------------------------------------------------------------------------------------------------------------------------------------------------------------------------------------------------|------------------------------------------------------------------------------------------------|------------------------------------------------------------------------------------------------------------------------------------------|------------------|-----------------------------------------------------------------------------------------|--------|
| Buemi et al. <sup>13</sup>  | 2019 | Italy       | December, 2009 to July, 2015 | 17/NA   | Retrospective | NA          | Diagnosed on the basis of clinical and imaging data                                                                                                                                                                                                      | Median 58.2 (range, 40–81)                                                                     | BEV alone (n = 4)<br>BEV plus fotemustine (n = 13)                                                                                       | Volume; CEL, T2L | The mean of the upper and lower Gaussian curve (ADC <sub>H</sub> and ADC <sub>L</sub> ) | PFS OS |
| Schell et al. <sup>14</sup> | 2020 | Netherlands | October, 2011 to April, 2020 | 242/154 | Retrospective | EORTC-26101 | Surgically confirmed (operated); must be at least one bi-dimensionally measurable contrast-enhancing lesion with clearly defined margins by MRI scan with minimal diameters of 10mm, visible on 2 or more axial slices 5mm apart, based on MRI scan done | BEV: median 58 (interquartile range, 51–65)<br>Non-BEV: median 60 (interquartile range, 52–66) | BEV alone (at PD: BEV + lomustine) (n = 54)<br>BEV plus lomustine (at PD: salvage treatment at the investigator's best choice) (n = 188) | Volume; CEL      | The mean of the lower Gaussian curve (ADC <sub>L</sub> )                                | PFS OS |

within two  
weeks prior to  
randomization  
(non-operated)

---

\*Region where the participants were treated

ROI, region-of-interest; ADC, apparent diffusion coefficient; NOS, Newcastle-Ottawa Scale; BEV, patients treated with bevacizumab; Non-BEV, patients treated without bevacizumab; PD, progression disease; CEL, contrast enhanced lesion; T2L, high intensity lesion on T2WI or FLAIR images; PFS, progression-free survival; OS, overall survival
